# Supplementary material for: Novel semiconducting nano-agents incorporating tirapazamine for imaging guided synergistic cancer hypoxia activated photo-chemotherapy
Source: Royal Society of Chemistry journal article supplement (doi:10.1039/d1tb00659b), 2021-01-01
Supplement: d1tb00659b1.pdf [file d1tb00659b1.pdf]

## Novel semiconducting nano-agents incorporating tirapazamine for imaging guided synergetic cancer hypoxia activated photo-chemotherapy

Guorong Zhang<sup>‡af</sup>, Weixiang Wang<sup>‡df</sup>, Huihui Zou<sup>bf</sup>, Zheng Wei<sup>ef</sup>, Chuanhui Song<sup>bf</sup>, Jianchuan Ran<sup>bf</sup>,  
Zichen Cao<sup>bf</sup>, Yu Cai<sup>\*c</sup>, Wei Han<sup>\*bf</sup>

*<sup>a</sup>Department of Orthodontics, Nanjing Stomatological Hospital, Medical School of Nanjing University, 30 Zhongyang Road, 210008, Nanjing, China.*

*<sup>b</sup>Department of Oral and Maxillofacial Surgery, Nanjing Stomatological Hospital, Medical School of Nanjing University, 30 Zhongyang Road, 210008, Nanjing, China.*

*<sup>c</sup>Clinical Research Institute, Zhejiang Provincial People's Hospital, People's Hospital of Hangzhou Medical College, No. 158 Shangtang Road, Hangzhou 310014, Zhejiang Province, China.*

*<sup>d</sup>Fourth Outpatient Department, Nanjing Stomatological Hospital, Medical School of Nanjing University, 30 Zhongyang Road, 210008, Nanjing, China.*

*<sup>e</sup>Pediatric Dentistry, Nanjing Stomatological Hospital, Medical School of Nanjing University, 30 Zhongyang Road, 210008, Nanjing, China.*

*<sup>f</sup>Central Laboratory of Stomatology, Nanjing Stomatological Hospital, Medical School of Nanjing University, 30 Zhongyang Road, 210008, Nanjing, China*

*E-mail: iamycail@163.com; doctorhanwei@hotmail.com.*

<sup>‡</sup> These authors contributed equally.

\* They are corresponding authors.

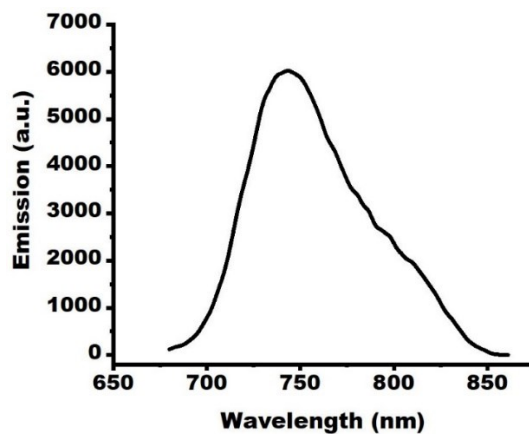

**Figure S1.** ITTC NPs fluorescence emission spectrum.

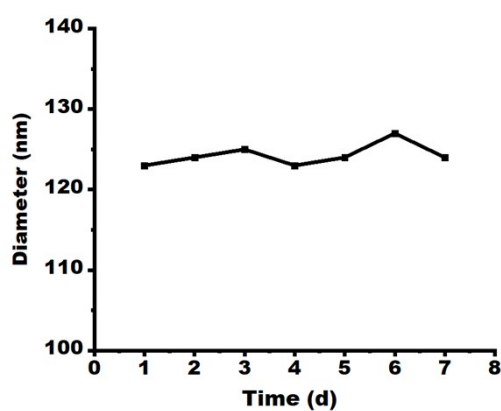

**Figure S2.** The average diameter changes of ITTC NPs within 7 days.

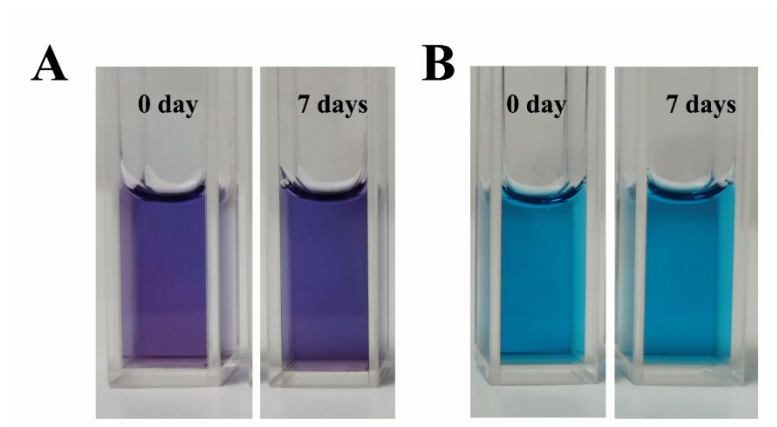

**Figure S3.** Represent photographs of ITTC NPs in DMEM (A, 30  $\mu\text{g}/\text{mL}$ ) and PBS (B, 30  $\mu\text{g}/\text{mL}$ ) for 7 days.
